# Supplementary material for: Stable puckered C2N2 nanosheet with giant anisotropic hole carrier mobility: insights from first-principles
Source: Royal Society of Chemistry journal article supplement (doi:10.1039/d0tc03814h), 2020-01-01
Supplement: d0tc03814h1.pdf [file d0tc03814h1.pdf]

**Electronic Supplementary Information for**  
**Stable puckered C<sub>2</sub>N<sub>2</sub> nanosheet with giant anisotropic hole carrier mobility: insights**  
**from first-principles**

Yanli Wang<sup>1, a)</sup> and Yi Ding<sup>2, b)</sup>

<sup>1)</sup> *Department of Physics, Zhejiang Sci-Tech University, Hangzhou, Zhejiang 310018, People's Republic of China*

<sup>2)</sup> *Department of Physics, Hangzhou Normal University, Hangzhou, Zhejiang 311121, People's Republic of China*

Table S1: the hole mobility information of bp-C<sub>2</sub>N<sub>2</sub> nanosheet from the FHI-aims calculation.

---

<sup>a)</sup> wangyanli-04@tsinghua.org.cn

<sup>b)</sup> dingyi2001@tsinghua.org.cn

TABLE I. Calculated hole mobility data by the FHI-aims code for the bp-C<sub>2</sub>N<sub>2</sub> nanosheet.  $C$ ,  $m$ ,  $E$  and  $\mu$  are the elastic constant, effective mass, deformation potential constant and carrier mobility, respectively. The data in brackets are calculated by the HSE functional, which is also done with the FHI-aims code.

|              | $C$   | $m$          | $E$            | $\mu$ ( $10^3\text{cm}^2\text{V}^{-1}\text{s}^{-1}$ ) |                |
|--------------|-------|--------------|----------------|-------------------------------------------------------|----------------|
|              | (N/m) | ( $m_0$ )    | (eV)           | DPT formula (1)                                       | DPT formula(2) |
| hole ( $x$ ) | 454   | 0.40 (0.41)  | -0.018 (0.051) | 22131 (5765)                                          | 1.52 (2.30)    |
| hole ( $y$ ) | 681   | 18.64 (6.53) | -5.84 (-6.14)  | 0.008 (0.036)                                         | 0.016 (0.070)  |
